# Supplementary material for: Characterization of Sodium Channel Peptides Obtained from the Venom of the Scorpion Centruroides bonito
Source: MDPI journal article supplement (doi:10.3390/toxins16030125), 2024-03-01
Supplement: s1 [file s1]

# Supplementary Materials: Characterization of Sodium Channel Peptides Obtained from the Venom of the Scorpion *Centruroides bonito*

Rita Restano-Cassulini, Timoteo Olamendi-Portugal, Lidia Riaño-Umbarila, Fernando Z. Zamudio, Gustavo Delgado-Prudencio, Baltazar Becerril and Lourival D. Possani

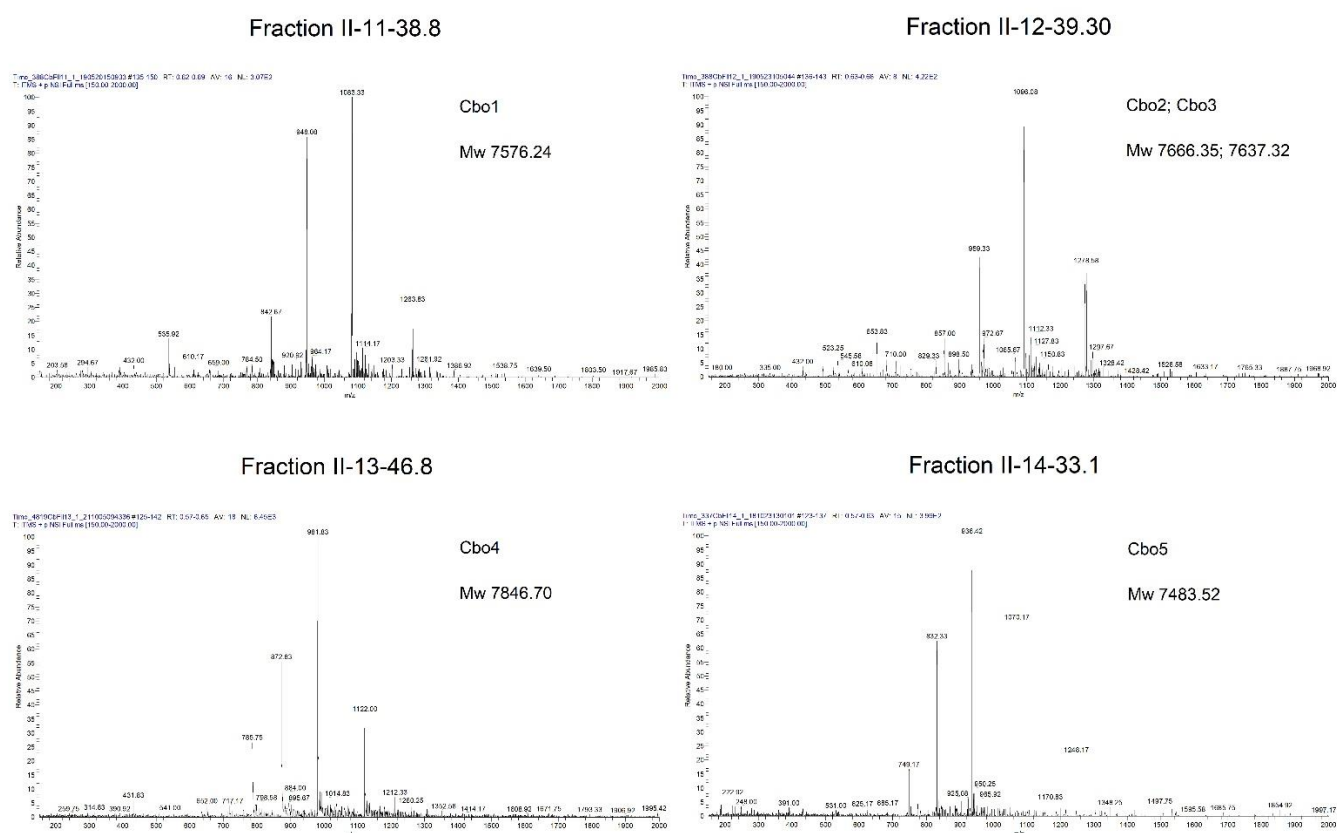

**Figure S1.** Mass spectrometry (MS) data. The mass spectrometry proteomics data have been deposited to the ProteomeXchange Consortium via the PRIDE partner repository with the dataset identifier PXD050138.

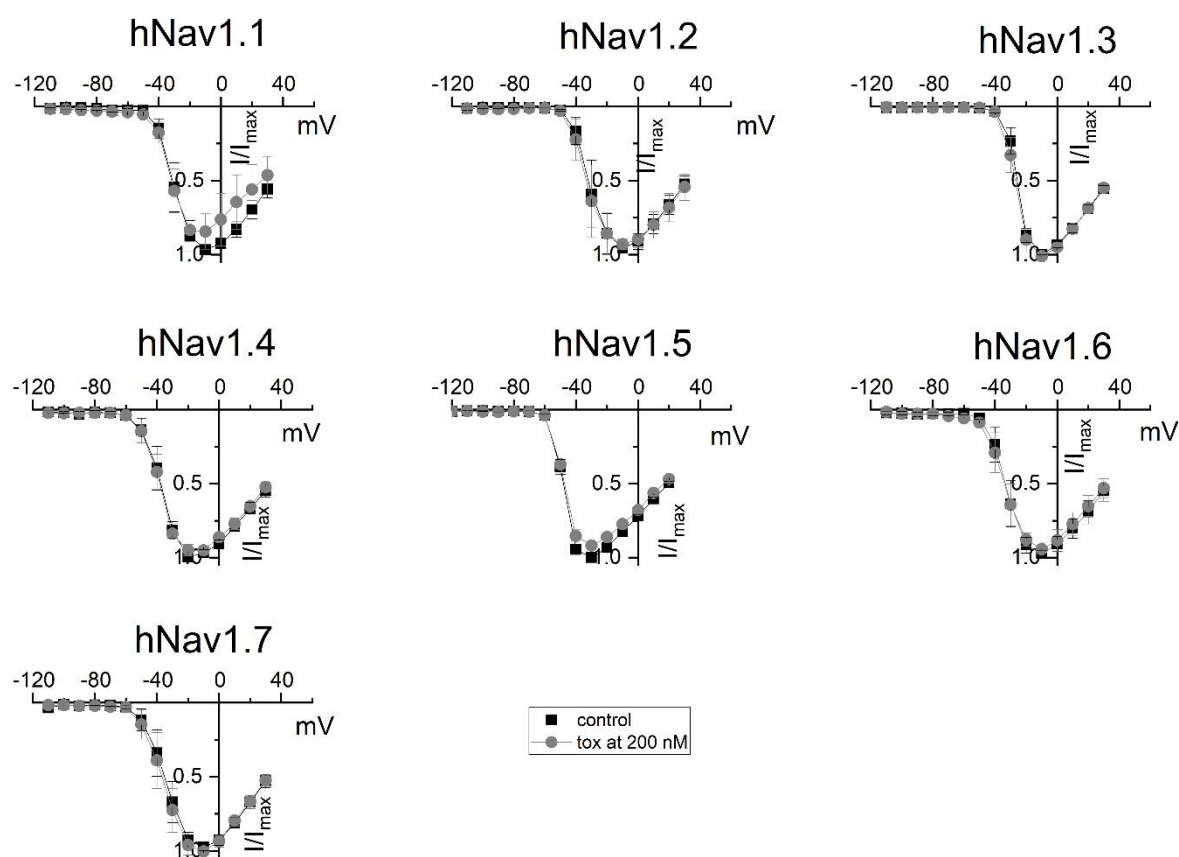

**Figure S2. Voltage gated sodium channels hNav 1.1 – hNav 1.7 are insensitive to Cbo5.** Figure shows current / voltage relation graphs for sodium currents recorded in control and after exposition of 200 nM of Cbo5 for 30-60 s. Symbols are accordingly to legend. Data are the mean of 3-4 cells.

**Table S1.** Determination of LD<sub>50</sub> of *C. bonito* venom using the "up and down" method.

| Dose (µg/mouse<br>weighing 20 g) | Alive (L) or dead(D) |   |   |   |   |   | Total<br>live | <i>i</i> |                       |   |
|----------------------------------|----------------------|---|---|---|---|---|---------------|----------|-----------------------|---|
| 20                               | D                    |   |   |   |   | D | 0             | 3        |                       |   |
| 18                               | D                    |   | D | D |   | L | D             | D        | 1                     | 2 |
| 16                               |                      | D | L | L | D | L |               | L        | 4                     | 1 |
| 14                               |                      |   | L |   |   | L |               |          | 2                     | 0 |
|                                  |                      |   |   |   |   |   |               | N =7     | Σ in <sub>i</sub> = 6 |   |

From the results reported in the table S1, the LD<sub>50</sub> was determined using the formula described by Dixon and Mood:

$$LD_{50} = y' + d \left( \frac{A}{N} + \frac{1}{2} \right)$$

Where:

$$y' = 14 \mu g$$

$$d = 2 \mu g$$

$$N = 7$$

$$\Sigma in_i = 6$$

Resulting in:

$$LD_{50} = 14 + 2 \left( \frac{6}{7} + \frac{1}{2} \right)$$

$$LD_{50} = 16.7 \mu g / \text{mouse of the CD1 strain weighing 20 g}$$

**Table S2.** Fitting parameters of data from activation, inactivation and total current of hNav 1.1-1.7 channels.

|        |              |                       | hNav 1.1      | hNav 1.2          | hNav 1.3      | hNav 1.4          | hNav 1.5        | hNav1.6           | hNav 1.7      |
|--------|--------------|-----------------------|---------------|-------------------|---------------|-------------------|-----------------|-------------------|---------------|
| Cbo1   | activation   | V <sub>0.5</sub> (mV) | -24.3 ± 0.27  | -21.86 ± 0.28     | -20.26 ± 0.25 | -24.03 ± 0.31     | -42.28 ± 0.39   | -22.52 ± 0.28     | -18.37 ± 0.15 |
|        |              |                       | -25.6 ± 0.23  | -22.35 ± 0.3      | -21.42 ± 0.26 | -23.12 ± 0.28     | -42.49 ± 0.36   | -57.37 ± 1.69 (*) | -18.7 ± 0.19  |
|        |              | slope                 | 8.65 ± 0.24   | 7.26 ± 0.25       | 7.43 ± 0.22   | 10.17 ± 0.27      | 5.91 ± 0.34     | 7.4 ± 0.25        | 8.35 ± 0.13   |
|        |              |                       | 8.95 ± 0.21   | 7.56 ± 0.26       | 7.7 ± 0.23    | 10.48 ± 0.25      | 5.77 ± 0.32     | 9.88 ± 1.07       | 8.5 ± 0.17    |
|        | inactivation | A                     | n.c.          | n.c.              | n.c.          | n.c.              | n.c.            | 0.43 ± 0.03       | n.c.          |
|        |              | V <sub>0.5</sub> (mV) | -62.67 ± 0.28 | -58.39 ± 0.19     | -59.2 ± 0.51  | -71.59 ± 0.33     | -75.27 ± 0.27   | -64 ± 0.57        | -65.57 ± 0.27 |
|        |              |                       | -65.21 ± 0.35 | -58.88 ± 0.19     | -59.49 ± 0.48 | -71.73 ± 0.37     | -74.59 ± 0.25   | -68.51 ± 1.05     | -65.02 ± 0.26 |
|        |              | slope                 | 7.67 ± 0.25   | 6.88 ± 0.17       | 9.55 ± 0.45   | 8.42 ± 0.29       | 7.6 ± 0.24      | 7.22 ± 0.5        | 9.15 ± 0.24   |
|        |              |                       | 7.78 ± 0.31   | 6.78 ± 0.17       | 9.76 ± 0.42   | 8.25 ± 0.33       | 7.51 ± 0.22     | 10.04 ± 0.93      | 9.08 ± 0.23   |
|        |              | I/I <sub>max</sub>    | 0.99 ± 0.02   | 0.98 ± 0.01       | 1.01 ± 0.01   | 0.89 ± 0.05       | 0.96 ± 0.01     | 0.75 ± 0.04 (*)   | 1.03 ± 0.03   |
|        |              | n                     | 5             | 5                 | 6             | 7                 | 5               | 6                 | 5             |
| Cbo2+3 | activation   | V <sub>0.5</sub> (mV) | -29.11 ± 0.34 | -30.27 ± 0.33     | -29.26 ± 0.31 | -27.57 ± 0.44     | -36.17 ± 0.45   | -20.39 ± 0.38     | -10.41 ± 0.29 |
|        |              |                       | -29.99 ± 0.37 | -32.12 ± 0.27     | -31.12 ± 0.38 | -28.62 ± 0.46     | -37.52 ± 0.33   | -34.95 ± 14.6(*)  | -10.43 ± 0.39 |
|        |              | slope                 | 8.03 ± 0.3    | 7.99 ± 0.29       | 6.32 ± 0.28   | 10.03 ± 0.39      | 7.45 ± 0.4      | -8 ± 0.34         | 7.98 ± 0.25   |
|        |              |                       | 7.99 ± 0.33   | 7.93 ± 0.24       | 6.02 ± 0.34   | 10.72 ± 0.4       | 7.31 ± 0.29     | -10.97 ± 2.16     | 8.48 ± 0.34   |
|        | inactivation | A                     | n.c.          | n.c.              | n.c.          | 0.98 ± 0.01       | n.c.            | 0.68 ± 0.3        | n.c.          |
|        |              | V <sub>0.5</sub> (mV) | -65.05 ± 0.39 | -66.31 ± 0.16     | -66.37 ± 0.21 | -74.93 ± 0.38     | -76.2 ± 0.31    | -62.09 ± 0.6      | -62.84 ± 0.21 |
|        |              |                       | -65.93 ± 0.34 | -66.72 ± 0.15     | -67.55 ± 0.18 | -76.21 ± 0.54     | -77.21 ± 0.41   | -63.91 ± 0.64     | -63.15 ± 0.22 |
|        |              | slope                 | 8.51 ± 0.34   | 7.4 ± 0.14        | 8.85 ± 0.19   | 7.54 ± 0.34       | 7.41 ± 0.27     | 6.91 ± 0.53       | 6.7 ±         |
|        |              |                       | 8.91 ± 0.3    | 7.51 ± 0.13       | 8.83 ± 0.16   | 8.53 ± 0.48       | 7.75 ± 0.36     | 7.1 ± 0.56        | 6.6 ±         |
|        |              | I/I <sub>max</sub>    | 1.01 ± 0.01   | 1.03 ± 0.1        | 1.02 ± 0.01   | 0.84 ± 0.09       | 0.96 ± 0.01     | 0.99 ± 0.01       | 1.02 ± 0.01   |
|        |              | n                     | 5             | 4                 | 3             | 5                 | 4               | 4                 | 3             |
| Cbo4   | activation   | V <sub>0.5</sub> (mV) | -21.12 ± 0.4  | -20.37 ± 0.34     | -27.55 ± 0.17 | -29.4 ± 0.46      | -45.17 ± 0.53   | -29.55 ± 0.29     | -16.41 ± 0.25 |
|        |              |                       | -22.18 ± 0.38 | -36.74 ± 4.08 (*) | -28.6 ± 0.22  | -41.73 ± 1.44 (*) | -40.9 ± 0.5 (*) | -66.23 ± 3.14 (*) | -17.31 ± 0.25 |
|        |              | slope                 | 7.86 ± 0.35   | -7.47 ± 0.3       | -9.01 ± 0.15  | -7.04 ± 0.41      | 6.62 ± 0.46     | -6.39 ± 0.25      | 7.14 ± 0.22   |
|        |              |                       | 8.57 ± 0.33   | -16.75 ± 1.45 (*) | -9.08 ± 0.2   | -15.87 ± 0.7 (*)  | 9.5 ± 0.44 (*)  | -6.56 ± 2.49      | 7.44 ± 0.22   |
|        | inactivation | A                     | n.c.          | 0.78 ± 0.04       | n.c.          | 0.34 ± 0.06       | n.c.            | 0.5 ± 0.06        | n.c.          |
|        |              | V <sub>0.5</sub> (mV) | -61.93 ± 0.23 | -57.06 ± 0.4      | -63.3 ± 0.38  | -71.48 ± 0.14     | -76.95 ± 0.3    | -63.17 ± 0.37     | -55.9 ± 0.41  |
|        |              |                       | -63.79 ± 0.44 | -59.21 ± 0.42     | -63.57 ± 0.29 | -74.82 ± 0.42     | -72.7 ± 0.61    | -65.67 ± 0.32     | -55.8 ± 0.49  |
|        |              | slope                 | 6.64 ± 0.2    | 6.5 ± 0.35        | 9.26 ± 0.34   | 6.95 ± 0.12       | 7.98 ± 0.27     | 6.53 ± 0.33       | 8.33 ± 0.36   |
|        |              |                       | 7 ± 0.39      | 7.49 ± 0.37       | 9.06 ± 0.25   | 8.91 ± 0.37       | 8.76 ± 0.54     | 6.94 ± 0.27       | 8.78 ± 0.43   |
|        |              | I/I <sub>max</sub>    | 0.96 ± 0.02   | 0.9 ± 0.03        | 0.99 ± 0.01   | 0.48 ± 0.07 (*)   | 0.26 ± 0.04 (*) | 0.44 ± 0.05 (*)   | 1.03 ± 0.01   |
|        |              | n                     | 4             | 4                 | 4             | 5                 | 5               | 5                 | 4             |

For activation and inactivation parameters, values of toxin treatment are in light grey shadow rows, while values of control are in no-shadow rows. V<sub>0.5</sub> (mV): membrane potential of middle activation or inactivation; A: fraction of channels unbound to the toxin; T (ms): time constant of the inactivation process, calculated at -10 mV; I/I<sub>max</sub>: fraction of residual current after toxin application; n: number of recorded cells; n.c.: not calculated. Data indicates the mean of 3-7 cells ± standard error.

(\*) mean significantly different at 0.05 level in a paired sample t Test.

**Table S3.** Plain text and FASTA format for toxins Cbo1 to Cbo5.

| Protein ID | Name | Sequence                                                                 | len |
|------------|------|--------------------------------------------------------------------------|-----|
| C0HMA3     | Cbo1 | KEGYLVNHSTGCKYECYKLGDNNDYCLRECKQQYGKGAGGYCYAFGCWC-<br>THLYEQAVVWPLPKKTCN | 66  |
| C0HMA4     | Cbo2 | KEGYIVNYHDGCKYECYKLGDNNDYCLRECRARYGKGAGGYCYAFGCWC-<br>THLYEQAVVWPLPKKTCN | 66  |
| C0HMA5     | Cbo3 | KEGYIVNYHDGCKYECYKLGDNNDYCLRECKARYGKGAGGYCYAFGCWC-<br>THLYEQAVVWPLPKKTCN | 66  |
| C0HMA6     | Cbo4 | KEGYIVDYHTGCKYTCAKLGDNNDYCVRECRLRYQSAHGYCYAFACWC-<br>THLYEQAVVWPLPNKRCK  | 66  |
| C0HMA7     | Cbo5 | KKDGYLVDKTGCKYTCWKLGENKYCNRECTWKHRGGNY-<br>GYCYGFGCYCEGLADSTQTWPLPNKSC   | 65  |

>C0HMA3\_Cbo1: KEGYLVNHSTGCKYECYKLGDNNDYCLRECKQQYGKGAGGYCYAFGCWC  
THLYEQAVVW-PLPKKTCN; >C0HMA4\_Cbo2: KEGYIVNYHDGCKYECYKLGDNNDYCLRECRARYGKGAGGYCYAFGCWC  
THLYEQAVVW-PLPKKTCN; >C0HMA5\_Cbo3: KEGYIVNYHDGCKYECYKLGDNNDYCLRECKARYGKGAGGYCYAFGCWC  
THLYEQAVVW-PLPKKTCN; >C0HMA6\_Cbo4: KEGYIVDYHTGCKYTCAKLGDNNDYCVRECRLRYQSAHGYCYAFACWC  
THLYEQAVVW-PLPNKRCK; >C0HMA7\_Cbo5: KKDGYLVDKTGCKYTCWKLGENKYCNRECTWKHRGGNYGYCYGFGCYCEGLADSTQTW-PLPNKSC
